# Supplementary material
Source: Royal Society of Chemistry journal article supplement (doi:10.1039/d5fo05016b)
Supplement: d5fo05016b1.xlsx [file d5fo05016b1.xlsx]

## Sheet: Raw data
ID	intervention	period	occipital_conn0	occipital_conn1	log_ht_glucuronide0	log_ht_glucuronide1	total_energy0	med_diet_score0	mvpa_minutes0	age0	weight0	bmi0	body_fat_pct0	muscle_mass_pct0	visceral_fat0	waist_circumference0	waist_hip_ratio0	systolic_bp0	diastolic_bp0	heart_rate0	total_cholesterol0	ldl_cholesterol0	hdl_cholesterol0	fasting_glucose0	sex0
12	EVOO	1	0.0908294	0.506309	0	5.13674	3772.19	9	308.964	27	79.1	24.1	14.9	42.5	6	84	0.875	123	80	62	186	122	52	87	1
12	OO	2	0.268431	0.281794	3.78769	0	3907.38	9	245.726	27	80.7	24.6	12.5	43.8	6	78.5	0.796954	133	76	57	153	79	57	83	1
13	OO	1	0.283457	0.327812	2.62016	3.14413	2480.31	10	294.167	25	65.4	21	12.7	44.1	3	76	0.791667	121	73	68	153	95	50	84	1
13	EVOO	2	0.248304	0.442607	3.26701	3.18819	3775.69	9	304.833	25	67.3	21.6	15	42.6	4	78.6	0.83617	122	64	73	171	100	61	83	1
14	EVOO	1	0.0335877	0.301168	4.04716	3.76187	2128.24	11	303	31	75.1	25.1	23.3	37.7	8	88	0.854369	114	69	49	216	155	42	95	1
14	OO	2	.	.	4.9895	3.53796	2223.66	10	268.655	31	75.7	25.3	23.7	37.5	8	83.5	0.795238	117	65	47	247	173	46	89	1
15	EVOO	1	0.257394	0.492623	2.26739	4.36948	2210.65	10	321.476	27	58.1	21.2	29.4	29.5	3	72	0.730964	103	69	51	154	75	69	82	2
15	OO	2	0.446442	0.309874	3.92726	4.01475	1650.79	8	344.512	27	59.2	21.6	30.6	29	4	69.5	0.743316	98	61	58	147	81	57	74	2
18	OO	1	0.495946	0.664858	0	0	2187.88	10	219.533	32	56.9	21.7	33.7	26.2	4	73	0.780749	101	67	66	165	95	52	91	2
18	EVOO	2	0.364205	0.560408	0	2.60056	2040.7	10	179.181	32	56.4	21.5	32.5	27	4	70.8	0.753191	110	64	67	163	102	46	81	2
19	EVOO	1	0.314904	0.428092	2.78871	2.88326	2725.11	12	380.056	29	55.1	20.7	24.7	32.3	3	72.8	0.81523	104	72	66	244	116	114	92	2
19	OO	2	0.601852	0.627718	3.35161	3.36432	1963.99	10	290.069	29	59	22.2	20.2	36	4	68.4	0.735484	109	78	68	176	70	94	84	2
20	OO	1	0.544345	0.745117	3.54138	4.39535	2070.17	13	276.988	31	64.1	26	37.4	27.2	6	76.5	0.746341	110	72	63	123	59	56	84	2
20	EVOO	2	0.469297	0.978204	4.16267	5.18584	2153.09	12	279.56	31	64.1	26	37.4	27.2	6	76.5	0.746341	110	72	63	129	71	50	79	2
23	EVOO	1	0.396324	0.745369	3.54374	4.44346	2985.9	2	266.8	35	62.7	23	22.5	37.2	7	84	0.893617	108	69	61	151	78	48	88	1
23	OO	2	0.458391	0.83288	4.15757	3.91824	2118.34	2	266.8	35	63.2	23.2	22	37.8	7	81.5	0.892662	115	68	60	172	85	60	93	1
24	OO	1	0.947236	0.528202	4.54149	4.42361	1544.71	6	364.679	36	83.9	28.5	29.1	34.1	12	95.3	0.907619	129	93	70	224	174	33	85	1
24	EVOO	2	0.398618	0.795126	4.57321	4.03019	1826.28	4	382.821	36	85	28.9	28.2	34.7	12	93.6	0.891429	128	89	71	212	145	35	85	1

## Sheet: Variable description
id: Participant identifier (anonymized)
intervention: 1=Regular OO; 2=EVOO
period: Intervention period (1 or 2)
occipital_conn0: Baseline occipital functional connectivity
occipital_conn1: Post-intervention occipital functional connectivity
log_ht_glucuronide0: Log-transformed urinary HT-glucuronide at baseline
log_ht_glucuronide1: Log-transformed urinary HT-glucuronide post-intervention
total_energy0: Baseline total energy intake (kcal/day)
med_diet_score0: Baseline Mediterranean diet score
mvpa_minutes0: Baseline moderate-to-vigorous physical activity (min/day)
age0: Age at baseline (years)
weight0: Body weight at baseline (kg)
bmi0: Body mass index at baseline (kg/m²)
body_fat_pct0: Body fat percentage at baseline (%)
muscle_mass_pct0: Muscle mass percentage at baseline (%)
visceral_fat0: Visceral fat level at baseline (%)
waist_circumference0: Waist circumference at baseline (cm)
waist_hip_ratio0: Waist-to-hip ratio at baseline
systolic_bp0: Systolic blood pressure at baseline (mmHg)
diastolic_bp0: Diastolic blood pressure at baseline (mmHg)
heart_rate0: Resting heart rate at baseline (beats per minute)
total_cholesterol0: Total cholesterol at baseline (mg/dL)
ldl_cholesterol0: LDL cholesterol at baseline (mg/dL)
hdl_cholesterol0: HDL cholesterol at baseline (mg/dL)
fasting_glucose0: Fasting glucose at baseline (mg/dL)
sex0: Sex (2=Female; 1=Male)
